# Supplementary material for: Reference Intervals of Total Testosterone in Adult Filipino Men
Source: Int J Endocrinol. 2020 Nov 28;2020:8877261. doi: 10.1155/2020/8877261 (PMC7719543; doi:10.1155/2020/8877261)
Supplement: Supplementary Materials — Figure 1: distribution of nontransformed data for total testosterone. Figure 2: distribution of nontransformed data for serum insulin. Figure 3: distribution of nontransformed data for sex hormone-binding globulin. Figure 4: distribution of transformed data for total testosterone. Figure 5: distribution of transformed data for serum insulin. Figure 6: distribution of transformed data for sex hormone-binding globulin. http://downloads.hindawi.com/journals/ije/2020/8877261.f1.zip. [file 8877261.f1.docx]

SUPPLEMENTARY FIGURES FOR

Reference Intervals of Total Testosterone in Adult Filipino Men

Myrna Buenaluz Sedurante1,Mark Isaiah K. Co2, Daryl Jade T. Dagang2, Racquel G. Bruno2, Annie Jane N. Sarmiento2, Michael L. Tee1

1Department of Physiology, University of the Philippines College of Medicine, Manila; 2Division of Endocrinology, Diabetes and Metabolism, Department of Medicine, University of the Philippines College of Medicine, Manila, Philippines


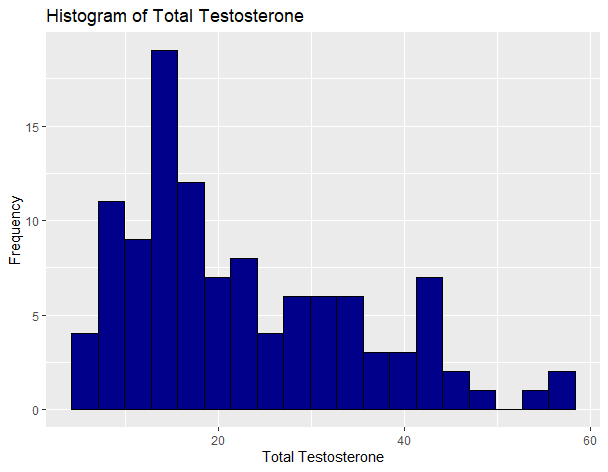


Supplementary Figure 1: Distribution of Non-Transformed Data for Total Testosterone


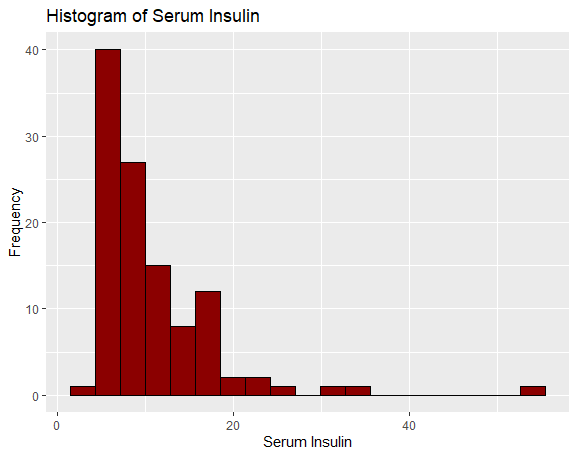


Supplementary Figure 2: Distribution of Non-Transformed Data for Insulin


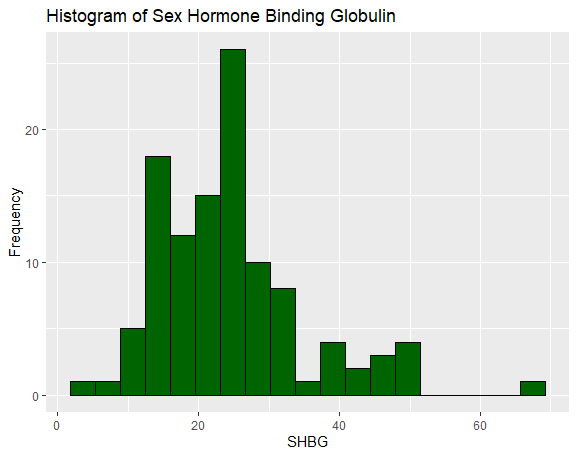


Supplementary Figure 3: Distribution of Non-Transformed Data for Sex Hormone Binding Globulin


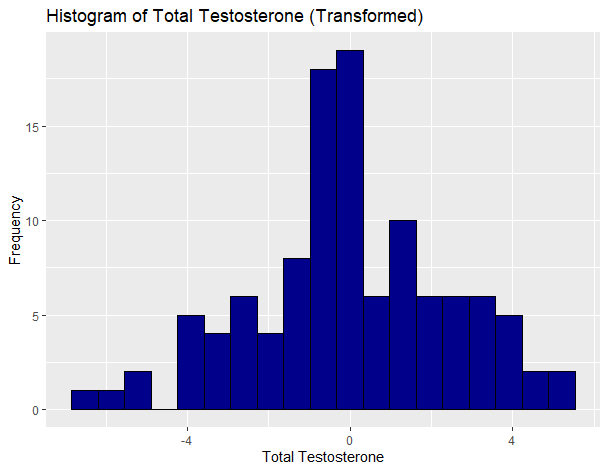


Supplementary Figure 4: Distribution of Transformed Data for Total Testosterone


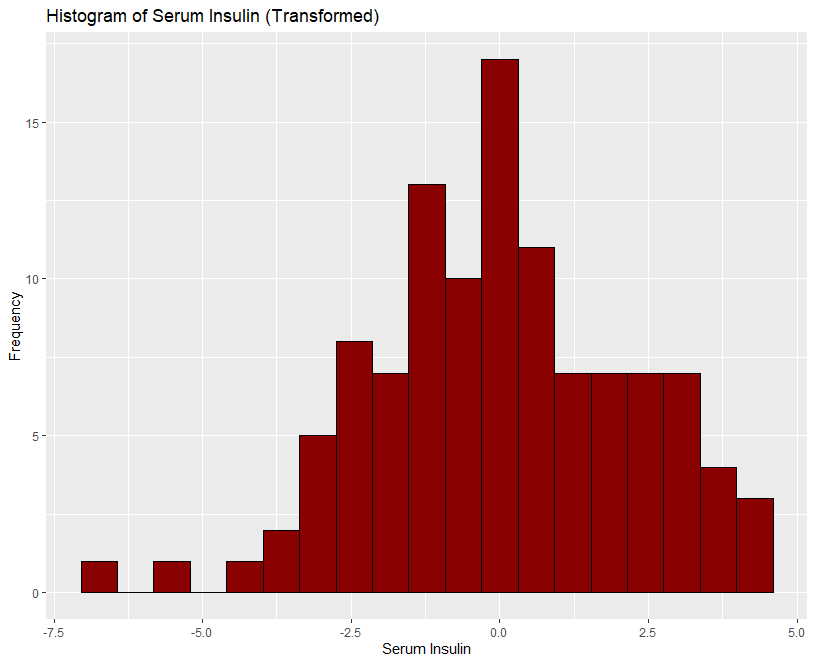


Supplementary Figure 5: Distribution of Transformed Data for Serum Insulin


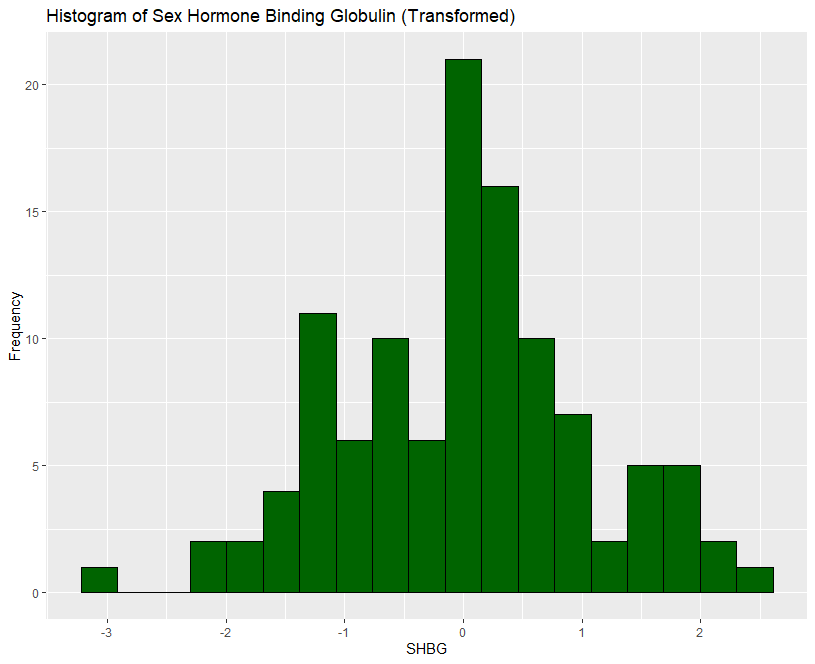


Supplementary Figure 6: Distribution of Transformed Data for Sex Hormone Binding Globulin
